1 **Strain dynamics of specific contaminant bacteria modulate the performance of ethanol**  
2 **biorefineries**

3

4 Felipe Senne de Oliveira Lino<sup>□1</sup>, Maria-Anna Misiakou<sup>□1</sup>, Kang Kang<sup>□2</sup>, Simone S. Li<sup>□1</sup>, Bruno  
5 Labate Vale da Costa<sup>3</sup>, Thiago Olitta Basso<sup>4</sup>, Gianni Panagiotou<sup>2</sup>, Morten Otto Alexander  
6 Sommer\*<sup>1</sup>

7 Authors affiliations:

8 1: The Novo Nordisk Foundation Center for Biosustainability. Technical University of Denmark.  
9 220 Kemitorvet, Kongens Lyngby 2800. Denmark.

10 2: Leibniz Institute for Natural Product Research and Infection Biology. Beutenbergstraße 11A,  
11 Jena 07745. Germany.

12 3: Escola de Engenharia de Alimentos da Universidade de Campinas. Rua Monteiro Lobato, 80.  
13 13083-862 Campinas, SP. Brazil.

14 4: Departamento de Engenharia Química da Escola Politécnica da Universidade de São Paulo.  
15 Universidade de São Paulo. Avenida Professor Lineu Prestes, 580. Cidade Universitária, 05508-  
16 000, São Paulo, SP. Brazil.

17

18 □: These authors have contributed equally.

19 \*: Corresponding author: Morten Otto Alexander Sommer – [msom@bio.dtu.dk](mailto:msom@bio.dtu.dk)

20

21

22 **Abstract**

23 Bioethanol is a viable alternative for fossil fuels, and its use has lowered CO<sub>2</sub> emissions by over  
24 500 million tonnes in Brazil alone by replacing more than 40% of the national gasoline  
25 consumption. However, contaminant bacteria reduce yields during fermentation. Our  
26 understanding of these contaminants is limited to targeted studies, and the interplay of the  
27 microbial community and its impact on fermentation efficiency remains poorly understood.  
28 Comprehensive surveying and longitudinal analysis using shotgun metagenomics of two major  
29 biorefineries over a production season revealed similar patterns in microbial community  
30 structure and dynamics throughout the entire fermentation system. Strain resolution  
31 metagenomics identified specific *Lactobacillus fermentum* strains as strongly associated with  
32 poor industrial performance and laboratory-scale fermentations revealed yield reductions of up to  
33  $4.63 \pm 1.35\%$  depending on the specific contaminating strains. Selective removal of these strains  
34 could reduce emissions from the bioethanol industry by more than  $2 \times 10^6$  tonnes per year. Using  
35 the large-scale Brazilian ethanol fermentations as a model system for studying microbiome-  
36 phenotype relationships this study further demonstrates how high-resolution metagenomics can  
37 identify culprits of large scale industrial biomanufacturing.

38

## 39 **Introduction**

40 The Brazilian sugarcane ethanol production process generates more than 30 billion liters of  
41 ethanol per year. This corresponds to more than 40% of all the energy consumed by light  
42 vehicles in Brazil replacing the demand for almost 550 million barrels of oil per year<sup>1</sup>. The use of  
43 this biofuel, either as a sole fuel or blended in the gasoline, results in reductions of more than  
44 60% in total greenhouse gases emissions<sup>1,2</sup>. The sugarcane ethanol production process deploys  
45 specific *Saccharomyces cerevisiae* strains, in very high cell density fed-batch fermentations  
46 operated with cell recycling<sup>3,4</sup>. Usually the production season lasts for 250 consecutive days per  
47 year, with an average mill performing up to 3 cycles of fermentation per day<sup>4</sup>. In total yeast cell  
48 populations in a single fermentation exceed  $10^8$  cells x ml<sup>-1</sup> <sup>4</sup>. Still, contamination of this non-  
49 sterile process remains a major problem leading to overall yield reductions of 3%, corresponding  
50 to over 960 million liters of ethanol <sup>5</sup>.

51  
52 Contamination is mainly caused by lactic acid bacteria already present on the raw material which  
53 tolerate ethanol, low pH and high temperature<sup>6</sup>. To control the bacterial contamination, yeast  
54 cells are acid washed after every fermentation cycle before re-innoculation<sup>4</sup>. In spite of such  
55 measures contamination continues to compromise the industrial process<sup>4,5,7</sup>. To further address  
56 this issue, antibiotics and other antimicrobial compounds are used for contamination control.  
57 However, antibiotic use raises serious concerns with regards to the global antibiotic resistance  
58 crisis and also negatively impacts process economics. Given the continuous problems with  
59 contamination there is an increasing need to understand the contaminating microbial community  
60 in these bioprocesses as well as its effect on yeast fermentations<sup>3-5,8</sup>.

61

62 Microbial communities are integral parts of most natural processes, from biogeochemical cycles  
63 to the human health<sup>9,10</sup>, and the interactions among populations within these communities often  
64 shape their functionalities and the surrounding environment<sup>11</sup>. To date, industrial fermentation  
65 microbiomes have been studied with limited resolution applying either culture based methods<sup>12–</sup>  
66 <sup>16</sup> or culture independent methods, like metabarcoding, focusing mainly in a specific process  
67 steps<sup>17,18</sup>. These studies have either tried mainly to understand the overall composition of the  
68 microbial community<sup>13,17,18</sup>, or to understand the impact of specific contaminant species in  
69 ethanol fermentations at controlled laboratory environments<sup>6,19,20</sup>. Yet, new studies are needed to  
70 correlate the composition of a complex community to actual industrial process performance, and  
71 to discern the potential impact of strain-level variations in the functionalities of such  
72 contaminating microbiomes<sup>21</sup>. Shotgun metagenomic sequencing could be a valuable tool for  
73 pinpointing the contaminants that most significantly affect the performance of currently  
74 established bioprocesses<sup>22</sup>.

75  
76 In the present work, we have sampled all the unitary steps of the ethanol production process of  
77 two mills in Brazil, during an entire fermentation season. We use shotgun metagenomics and  
78 cultivation-based approaches to analyze the microbial community composition and pinpoint  
79 specific detrimental strains configurations negatively impacting overall process performance, as  
80 well as the mechanisms governing the community dynamics. This set of new information reveals  
81 that higher-resolution metagenomics analysis are critical for understanding the dynamics of  
82 microbial communities, and that strain level modifications are responsible for perturbing a  
83 established microbiome.

84

85

## 86 **Results**

### 87 **Independent sugarcane biorefineries share similar microbiome dynamics**

88 We selected two independently operated sugarcane ethanol mills in Brazil, hereafter referred to  
89 as Mill A and Mill B, located over 300 km from each other but situated in similar climate regions  
90 (**Methods**). The mills are also similar in overall production capacity and deploy the Melle-  
91 Boinot fermentation process (**Figure 1A**)<sup>4</sup>. In this process ethanol is produced via fast, high cell-  
92 density, fed-batch fermentations. After the fermentation is finished yeast biomass is recovered  
93 via centrifugation. This yeast cream is transferred to a separate vat, diluted with water and acid  
94 washed to kill the contaminant bacteria. After this treatment, the yeast cream is pumped back to  
95 the fermenters, and the process starts over for as many as 750 fermentation batches per year<sup>4</sup>.  
96 The fermentation process is comprised of unidirectional steps providing defined sampling points  
97 for our analysis (**Figure 1A**). To reduce potential bias introduced by seasonal variation, we  
98 sampled each mill at three distinct timepoints throughout the production season (**Supplementary**  
99 **Table 1**). We also collected fermentation metrics relevant to evaluate the ethanol production  
100 process performance (**Supplementary Table 1**). In total, shotgun metagenomic sequencing was  
101 applied to 56 samples yielding more than  $2.8 \times 10^5$  Gbp high quality data (**Supplementary Table**  
102 **2, Methods**).

103

104 Focusing on the prokaryotic component of the metagenomes ( $29.16 \pm 25.19\%$ ), we found  
105 Firmicutes to be the most prevalent phylum, owing mostly to a high abundance of  
106 *Lactobacillaceae* species (**Figure 1B, Supplementary Table 3, Supplementary Table**  
107 **4**)<sup>6,13,18,19</sup>. Microbial communities from fermentation broth were found to be the most diverse and  
108 least similar to those in the rest of the fermentation process (**Supplementary Figure 1**). This

109 difference is mainly driven by the overall dominance of lactobacilli during the fermentation  
110 process, since these organisms are best fit to handle the low oxygen and pH, and high  
111 temperature and ethanol concentrations, found in industrial fermentations<sup>19</sup>. In addition, we  
112 observed that the composition of the contaminant microbiomes across all industrial process steps  
113 were highly similar by the end of the production season (final sampling timepoint). Inspection of  
114 the collected data revealed that both mills were operating below maximum capacity due to lack  
115 of raw material, which resulted in microbial biomass being left idle for longer periods in the  
116 fermentation vessels. Irrespective of this the microbial communities of both mills were not found  
117 to differ significantly when comparing across process steps and timepoints ( $p=0.293$ ,  
118 PERMANOVA; **Supplementary Figure 2**).

119  
120 The majority of the microbial communities, throughout the entire fermentation process, were  
121 found to be dominated by either *L. fermentum* or *L. amylovorus* (**Figure 1B**). These two species  
122 have independently been described as contaminants in other ethanol fermentation processes<sup>6,23,24</sup>.  
123 We find that these two species constitute more than 50% of the relative abundance of these  
124 contaminating communities, demonstrating how uneven such communities are. Interestingly,  
125 when comparing relative abundances, we detected an inverse relationship between the two  
126 species during the fermentation stages, which suggests competition between *L. fermentum* and *L.*  
127 *amylovorus* during the ethanol production process (Spearman's correlation  $\rho = -0.908$ ; FDR <  
128  $4.3 \times 10^{-14}$ , **Figure 1C**). For both mills, a similar pattern was observed, where *L. amylovorus*  
129 dominates at the beginning of the fermentation followed by a decline in its relative abundance in  
130 the community throughout the fermentation process.

131

132 In contrast *L. fermentum* expands its relative abundance in the community from the beginning to  
 133 the end of the fermentation. The tolerance of *L. fermentum* towards high ethanol titres<sup>13</sup> might  
 134 partly explain its higher relative abundance in the community during the final stages of  
 135 fermentation. The heterofermentative metabolism of *L. fermentum* might also be better suited to  
 136 compete with yeast for nutrients in this fermentation setup, compared to the homofermentative  
 137 metabolism of *L. amylovorus*<sup>6</sup>.

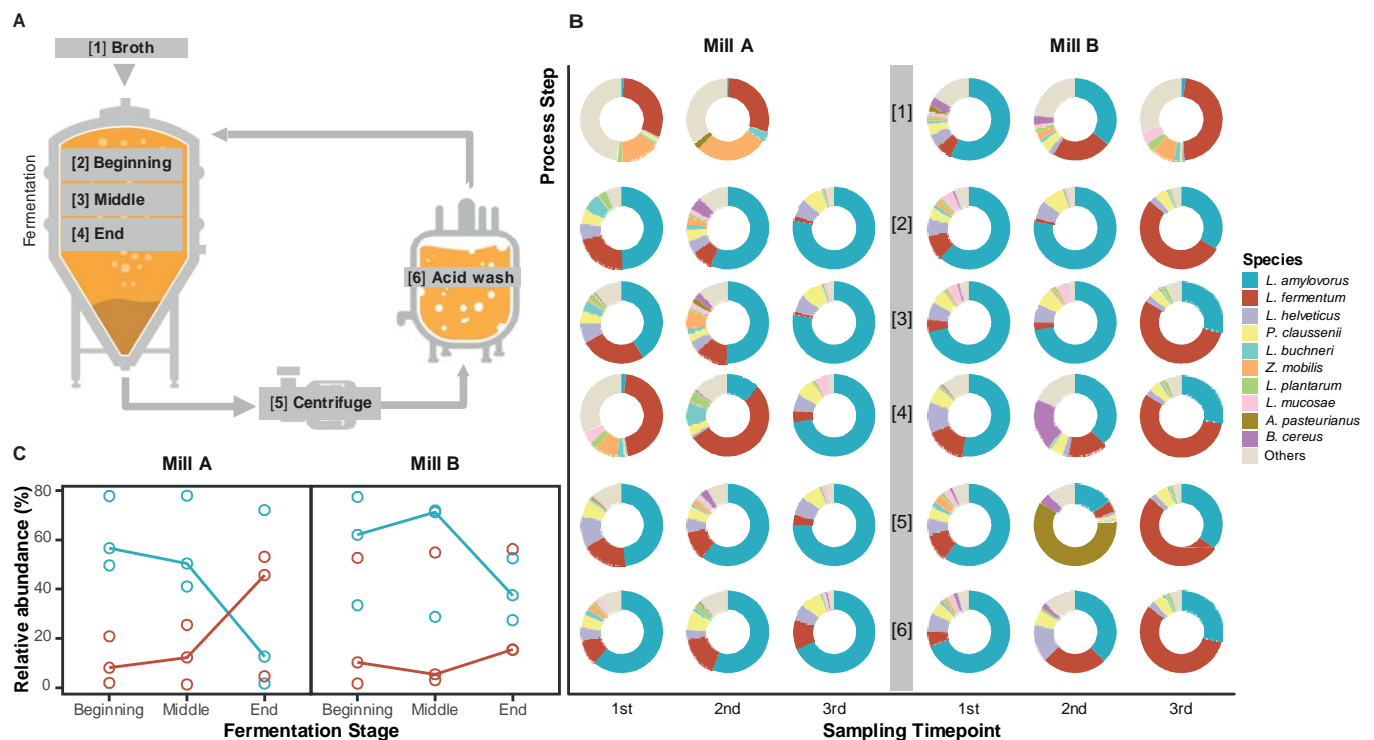

138  
 139

140 **Figure 1: Sampling strategy and competition between *L. amylovorus* and *L. fermentum* in**  
 141 **the bioethanol fermentation process. A:** Schematic of the fermentation process, indicating  
 142 sampled steps: 1. Broth: Feeding line with fresh fermentation media; 2. Fermentation beginning:  
 143 the beginning until middle of vessel feeding time (e.g. time 0 to 1.5h of feeding); 3. Middle: the  
 144 middle until the end of feeding (e.g. time 1.5 to 3h of feeding); 4. End: the final hours of  
 145 fermentation, after feeding ceased; 5. Centrifuge: the yeast cream, resulting from the separation

146 of the wine sent to distillation; 6. Acid wash: samples collected by the end of this treatment.  
147 Vector images were obtained from Flaticon ([www.flaticon.com](http://www.flaticon.com)). **B:** Species-level microbial  
148 community showing the 10 most prevalent contaminants across sampling timepoints (x-axis) and  
149 process steps (y-axis) in Mills A (left) and B (right), expressed as relative abundances. Beige  
150 color indicates all remaining species of the community. **C:** Relative abundances of *L.*  
151 *amylovorus* (blue) and *L. fermentum* (red) across the fermentation steps, as shown in **A**.  
152 Spearman's correlation analysis of their relative abundances suggests competition among these  
153 two species ( $r = -0.908$ ;  $FDR < 4.3 \times 10^{-14}$ ). Due to low biomass, DNA extraction was not  
154 possible for sample [1] for the 3<sup>rd</sup> sampling timepoint from Mill A. During the 3<sup>rd</sup> sampling  
155 timepoint, Mill B was operating below its maximum capacity. Biomass was left idle for longer  
156 periods in the vessels. This might explain why all the process steps are similar in community  
157 composition.

158

### 159 **Microbial community composition affects industrial process performance**

160 To establish if the dynamics observed within the contaminant microbial community were  
161 associated with environmental factors or overall fermentation yield, we incorporated  
162 fermentation data and industrial performance indicators into our analyses (**Figure 2A**,  
163 **Supplementary Table 1**). Throughout the bioethanol production season, increased ethanol yield  
164 was found to strongly associate with lower acidity titres in the fermentation (Spearman's  
165 correlation  $\rho = -0.84$ ,  $FDR = 2.09 \times 10^{-5}$ ), while increases in bacteria negatively impacted the  
166 yeast viability ( $\rho = -0.72$ ,  $FDR = 2 \times 10^{-3}$ ).

167



168 Based on these findings, we then sought to identify contaminant species that were associated  
 169 with fermentation performance (**Methods**). We did not expect to find strong associations  
 170 between the species abundance and ethanol yield, due to well-documented caveats of ethanol  
 171 quantification methods<sup>25</sup>. Yet, *L. fermentum* was found to be strongly associated with increased  
 172 acidity titres, which hamper ethanol yield (**Figure 2A and 2B**, Spearman's correlation  $\rho =$   
 173  $0.72$ ,  $FDR < 1.50 \times 10^{-6}$ ). We also identified a number of bacterial species that were not  
 174 previously associated with impacts over industrial ethanol production, like *Geobacillus*  
 175 *stearothermophilus*. This species is a thermophile capable of producing a vast array of  
 176 cellulolytic enzymes<sup>26</sup>. Its presence in the fermentation suggests that this industrial environment  
 177 is a potential untapped source for novel industrially relevant enzymes.

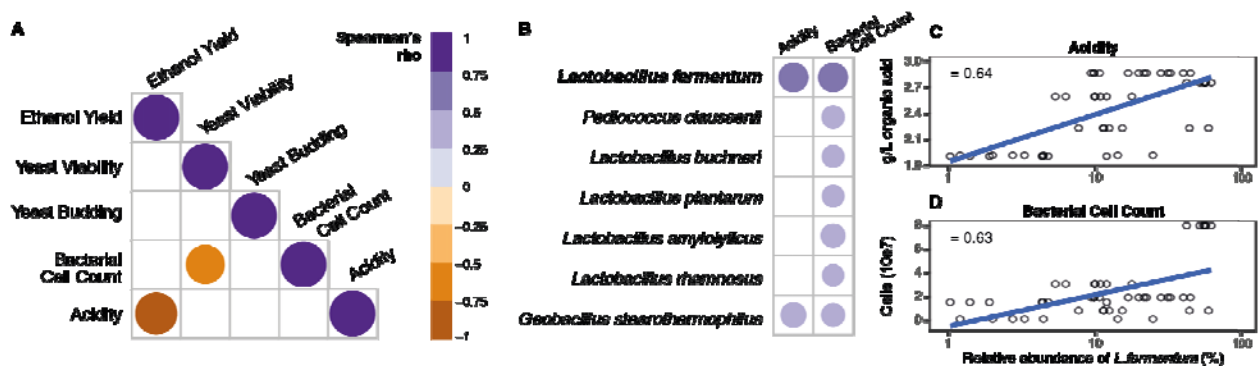

178  
 179 **Figure 2: Microbial species and other factors that influence industrial fermentation**  
 180 **performance.** **A:** Fermentation parameters that showed strong associations throughout the  
 181 production season. Positive correlations are depicted as purple, whereas negative correlations are  
 182 depicted as orange. Size of each point denotes the strength of correlation. Increased acidity is  
 183 linked with lower ethanol yield, and increased number of bacterial cells reduces yeast viability.  
 184 **B:** Microbial species associated with fermentation performance. Increased *L. fermentum* during  
 185 fermentation is strongly linked to higher acidity titres. Species are ordered by decreasing relative  
 186 abundance. **C:** Correlation between relative abundance of *L. fermentum* and acidity ( $\rho=0.64$ ;

187 FDR =  $1.5 \times 10^{-5}$ ). **D:** Correlation between relative abundance of *L. fermentum* and bacterial cell  
188 count ( $\rho = 0.63$ ; FDR =  $9.5 \times 10^{-6}$ ).

189

190 **The fate of fermentations is defined by the interplay of different *L. fermentum* strains**  
191 **during the acid wash**

192 Given its strong association with increased acidity, which creates detrimental fermentation  
193 conditions<sup>19</sup>, we sought to establish if the negative effect conferred by *L. fermentum* was  
194 mediated by strain variants of this bacteria. SNV profiling of core *L. fermentum* genes revealed  
195 the presence of 3 distinct strain families within the species (**Methods, Supplementary Figure 3,**  
196 **Supplementary Table 5**). Applying these profiles to our samples enabled insights into the strain  
197 population structure and dynamics during industrial fermentation and its impact on performance.

198

199 To more accurately evaluate and compare the performance amongst different fermentation  
200 batches<sup>25</sup>, we devised a composite parameter that incorporated ethanol yield measurements, as  
201 well as parameters related to the biological catalyst quality (yeast viability) and potential hazards  
202 due to microbial contamination (bacterial cell counts, fermented broth acidity). We termed this  
203 metric the Industrial Performance (**Methods**).

204

205 The correlation of strain clusters with different components of industrial performance (i.e. acidity  
206 and yeast viability) suggests that specific phenotypes are more detrimental to the industrial  
207 process. Organic acids are the main metabolites produced by *L. fermentum*, and is involved in the  
208 reduction of yeast viability and metabolic capacity due to intracellular acidification and anion  
209 accumulation<sup>27</sup>. Acidity is, therefore, an indirect measurement of its metabolism, and its negative

210 impact on ethanol yield and industrial performance demonstrates that the metabolism and growth  
211 of bacteria is critical for this industry.

212

213 For both mills, a similar trend was observed in which poorer industrial performances are  
214 observed when strain clusters 1 and 3 are dominant in the *L. fermentum* population (>50% in  
215 relative abundance). In contrast, dominance of *L. fermentum* strain cluster 2 is linked with  
216 improved industrial performance ( $p < 0.02$  in both mills; Wilcoxon rank-sum test, **Figure 3A**).

217 This new evidence suggests that, contrary to what is currently considered in the literature, the  
218 impact of *L. fermentum* in the fermentations is driven by its population's strain composition,  
219 rather than its abundance in the process<sup>19,28-32</sup>. It also suggests that current contamination control  
220 practices need to take into account the strain dominance, in order to choose the best molecule or  
221 mode of application. This can only be achieved with higher resolution diagnostics.

222 To understand the mechanism underlying these different population composition in fermentation  
223 with high and low industrial performance we analysed the *L. fermentum* population composition  
224 for each unitary step of the fermentation process. The population composition during the  
225 beginning of the fermentation is crucial for defining the industrial performance of the  
226 fermentation batch. More specifically, the relative abundance of strain cluster 2 is directly  
227 correlated with higher industrial performances scores ( $\rho = 0.73$ , FDR = 0.003), and the  
228 abundance of strain clusters 1 and 3 are linked to lower industrial performance scores ( $\rho = -0.51$ ,  
229 FDR = 0.042;  $\rho = -0.70$ , FDR=0.006, respectively) (**Supplementary Table 6**).

230

231 Notably, the strain level composition of strain clusters 1 and 2 in the acid wash tank, the unitary  
232 step immediately prior to the new fermentation batch, is directly correlated with their relative

233 abundance in the beginning of the fermentation defining the strain composition of new batches ( $\rho$   
234 = 0.60 and FDR = 0.016 for cluster 1;  $\rho$  = 0.85 and FDR = 0.0002 for cluster 2) (**Supplementary**  
235 **Table 6**). The direct correlation between acid wash and the beginning of the fermentation  
236 suggests that the microbial community composition is mainly driven by cell recycle, rather than  
237 the addition of novel contaminants through the broth. This hypothesis is further backed by the  
238 higher dissimilarity observed in the broth, when compared to the other fermentation steps  
239 (**Supplementary Table 1**), suggesting a more diverse and different community composition than  
240 the one found in actual fermentations.

241  
242 The population dynamics of the two strain clusters suggest direct competition in the acid wash ( $\rho$   
243 = -0.81, FDR =  $1.6 \times 10^{-4}$ ; **Figure 3B**). The outcome of this competition between closely related  
244 strain clusters in the acid wash is decisive for the industrial performance of the following  
245 fermentations.

246  
247 Focusing on identifying potential process parameters that could influence this strain level  
248 dynamics we have analysed the correlation between the strain level compositions of *L.*  
249 *fermentum* populations against all registered metadata. We have also broken down this analysis  
250 into the specific operational processes, in order to identify any trends correlated with a specific  
251 step of the ethanol production process. The fermentation temperature found in individual vessels  
252 is the key driving factor defining *L. fermentum* strain level composition in the acid wash. More  
253 specifically, higher temperatures throughout the fermentation lead to a higher relative abundance  
254 of strain cluster 1 in the acid wash, after the fermentation ( $\rho$  = 0.55, FDR = 0.0001; **Figure 3C**),  
255 favouring this specific cluster. In that way, the different fermentation batches are intimately

256 connected, and the impact on process is more dependent on the established microbiome rather  
 257 than novel contaminants entering via fermentation broth.

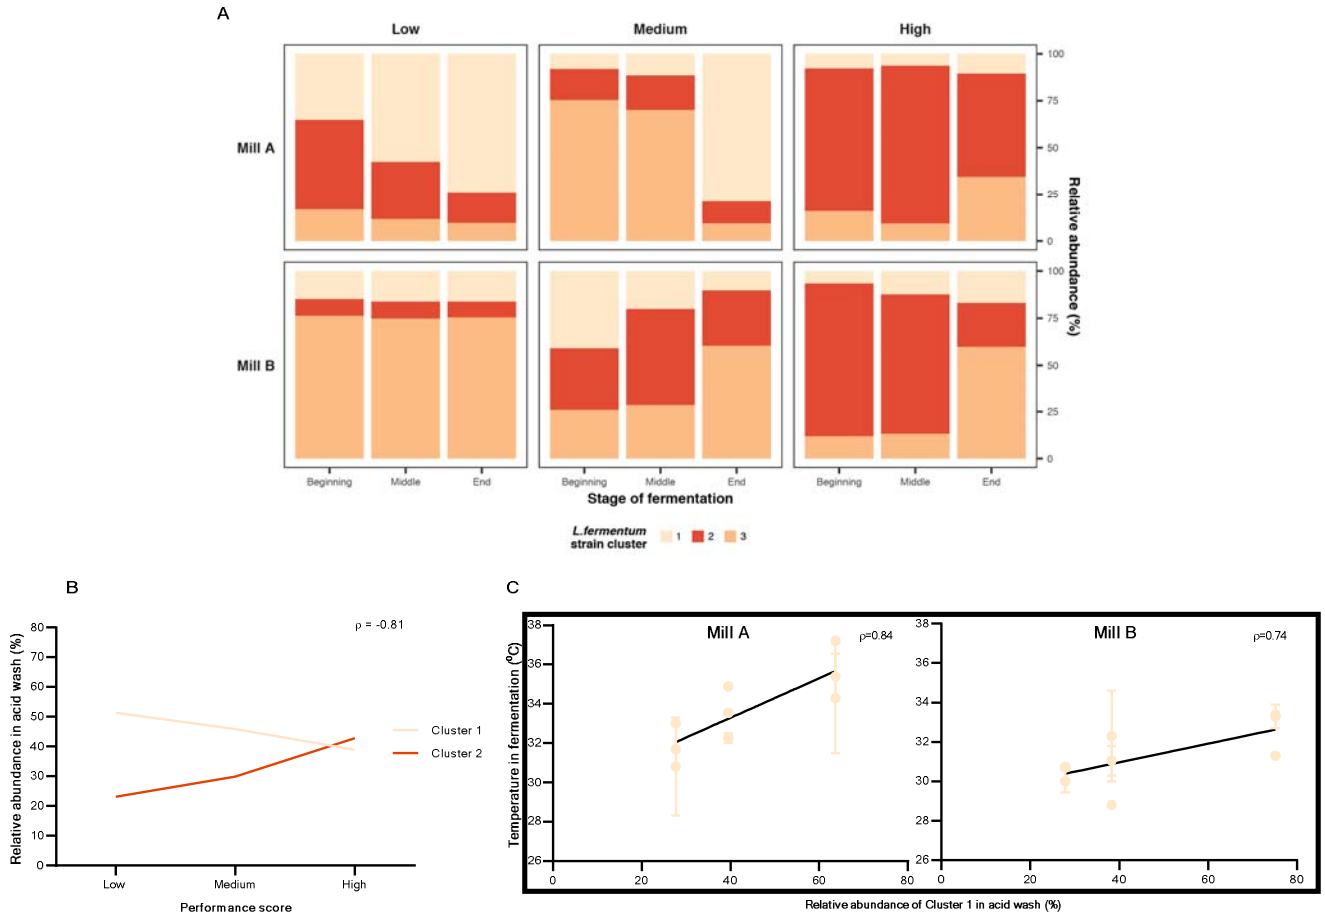

258  
 259

260 **Figure 3: *L. fermentum* strain dominance is associated with process performance. A:** The  
 261 mean relative abundances of the 3 *L. fermentum* strain clusters, within its population, in all  
 262 fermentation steps (beginning, middle and end) against industrial performance score (Low,  
 263 Medium and High). Strain cluster 2 dominates high-performance batches during most of the  
 264 fermentation process ( $p < 0.02$ ), whereas clusters 1 and 3 reach their lowest relative abundances in  
 265 these high-performance batches. **B:** The interplay between *L. fermentum* strain clusters 1 and 2 in  
 266 the acid wash are intimately connected the population composition in the beginning of the

267 fermentation ( $\rho = 0.52$  and  $FDR = 0.021$ ,  $\rho = 0.82$  and  $FDR = 0.004$  for clusters 1 and 2,  
268 respectively) and with performance scores. The competition between these two strain clusters  
269 decides the fate of the next fermentation batch, being mutually exclusive in the acid wash ( $\rho = -$   
270  $0.81$ ,  $FDR = 1.6 \times 10^{-4}$ ). **C:** Higher fermentation temperatures privilege the detrimental strain  
271 cluster 1, being directly correlated with its higher relative abundance in the acid wash, and in  
272 subsequent fermentations, for both mills ( $\rho = 0.84$ ,  $FDR = 0.0048$  for mill A;  $\rho=0.74$ ,  $FDR=$   
273  $0.0185$  for mill B).

274

275 Temperatures above  $32^{\circ}\text{C}$  during the fermentation process are correlated with higher relative  
276 abundances of cluster 1, and with lower performance scores. Keeping the fermentation below  
277 this temperature threshold would, therefore, favour strain cluster 2, a less detrimental cluster of  
278 *L. fermentum*.

279

280 To test if our hypothesis is correct we sought to investigate if there are strain level variance in the  
281 temperature dependence of the growth rate of different *Lactobacillus* strains. In laboratory  
282 conditions it was also possible to replicate this phenomenon. The growth rate ( $\text{h}^{-1}$ ) of actual  
283 industrial lactobacilli isolates was compared in two different temperatures ( $30^{\circ}\text{C}$  and  $37^{\circ}\text{C}$ ).  
284 While *L. amylovorus* shows a growth rate 14% higher at  $30^{\circ}\text{C}$ , the three different strains of *L.*  
285 *fermentum* are favoured by higher temperatures, but with considerable differences among them.  
286 Strain F1 had its growth rate leaping from 0.03 to 0.21, a 5 fold increase in the growth rate.  
287 Strain F2 shows a growth rate 76% higher at  $37^{\circ}\text{C}$ , and Strain F3 a growth rate 170% higher  
288 (**Figure 4**). These results suggest that the strain level dynamics of microbial populations is

289 directly affected by environmental factors, and might be responsible for shaping the  
290 functionalities of microbiomes.

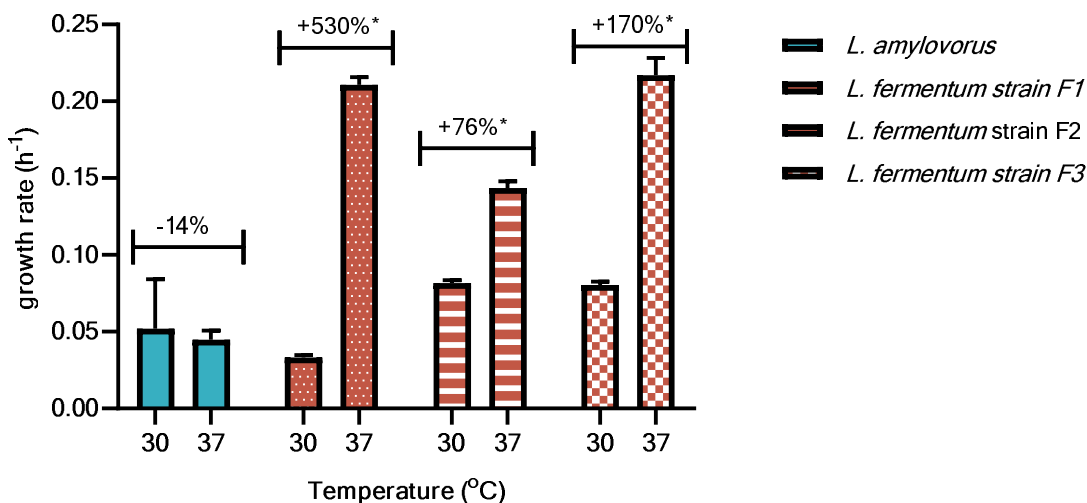

291  
292 **Figure 4: The influence of temperature in the growth rate (h<sup>-1</sup>) of different industrial**  
293 **isolates.** Higher fermentation temperatures favours *L. fermentum* in detriment of *L. amylovorus*,  
294 which has its growth rate reduced in 14% (from 0.052±0.026 to 0.045±0.005). Within *L.*  
295 *fermentum*, different strains display diverse responses to the increase of temperature. Strain F1  
296 shows an average increase in its growth rate of 530% (from 0.33±0.001 to 0.211±0.004). Strain  
297 F2 grows 76% faster (from 0.082±0.002 to 0.143±0.004), and strain F3, 170% (from 0.08±0.002  
298 to 0.217±0.009). \*p < 0.05.

299  
300  
301 The comparison of the pangenomes of the 3 *L. fermentum* strain clusters revealed the presence of  
302 functions and pathways not found in the other strains, which may be associated with their impact  
303 and prevalence on the industrial process. (Methods, Supplementary Table 7). Strain clusters 1  
304 and 3 (the most detrimental ones) present several unique genes which seem to be correlated to an

305 adaptation for living and growing in the fermentation environment. Furthermore, strain cluster 1  
306 contains arginine biosynthesis genes (KO1438), an amino acid that *L. fermentum* is otherwise  
307 known to be auxotrophic for<sup>34</sup>. Ameliorating this auxotrophy could improve the competitive  
308 fitness of this strain in an amino acid depleted environment<sup>35</sup>.

309

### 310 **Loss of performance in fermentation is related to the competition between bacteria and** 311 **yeast, and the metabolite profile of *L. fermentum* strains**

312 To elucidate the impact of strain variation on the ethanol fermentation yield by *S. cerevisiae*, we  
313 performed static batch cultivations, using the model yeast strain PE-2 and *L. fermentum* strains  
314 isolated from the samples used in our microbiome analyses (**Figure 5A**). Here, we conducted  
315 pairwise fermentations that simulated the conditions of a typical industrial setup by applying a  
316 yeast-to-bacteria ratio of 100:1<sup>5</sup>, and using a chemically-semi defined synthetic medium that  
317 resembles the sugarcane molasses-based broth<sup>36,37</sup>.

318

319 The yield obtained from the standalone fermentation by yeast PE-2 served as a control. To  
320 further contextualise our findings, we repeated these experiments on the 6 most abundant  
321 bacterial species (**Figure 1B**). Altogether, the species we analysed account for almost 80% of  
322 known species in the contaminant microbiome (**Supplementary Table 4**).

323

324 Our results demonstrate that the presence of *L. fermentum*, compared to other abundant bacterial  
325 species, can have a negative impact on fermentation performance<sup>20</sup>, with one strain decreasing  
326 ethanol yield by 4.63±1.35% (**Figure 5A**). This contrasts with *L. amylovorus*, *P. claussenii* or *L.*  
327 *buchneri*, which showed positive effects on ethanol yield (multiple t-test,  $p < 0.05$ ). Both *L.*



328 *amylovorus* and *P. clausenii* have a homofermentative metabolism, which has been shown to be  
329 less detrimental to *S. cerevisiae* in this fermentation setup<sup>6</sup>. Notably, *L. buchneri* strains have  
330 previously been shown to produce considerable amounts of ethanol and lactate from glucose<sup>38</sup>.  
331 This ethanol production might contribute to greater ethanol titres and yields, despite competing  
332 with yeast during the fermentation process. These observations are reinforced by our  
333 metagenomics analyses, where the presence of these species correlated poorly with acidity,  
334 which was strongly associated with lower ethanol yields (**Figure 2B**).

335  
336 Interestingly, we provide experimental evidence that not all *L. fermentum* strains are detrimental,  
337 as in the case of strain F2 (91.38±3.04%), which was comparable to control (89.23±0.23%;  
338 multiple t-test,  $p < 0.05$ ). When comparing the metabolite profile of supernatants from  
339 monocultures of the *L. fermentum* isolate strains, we observe that there is a striking difference  
340 between the somewhat neutral strain F1 and the beneficial strain F2 with the detrimental strain  
341 F3. Not only its organic acid production titre is twice as the one observed for strains F1 and F2, it  
342 also does not produce ethanol, which will have a direct impact on final ethanol titre and yield of  
343 co-cultures with *S. cerevisiae* (**Figure 5B**). These findings are in accordance to literature  
344 observations, which suggest that the ratio between different organic acids is more important than  
345 the high titres of specific organic acids for the inhibition of *S. cerevisiae*<sup>27,39</sup>. This data  
346 demonstrates the importance to monitor not just the total acidity, but also the composition of the  
347 organic acid pool, in order to adapt the response to microbial contamination accordingly to this  
348 particular data.

349

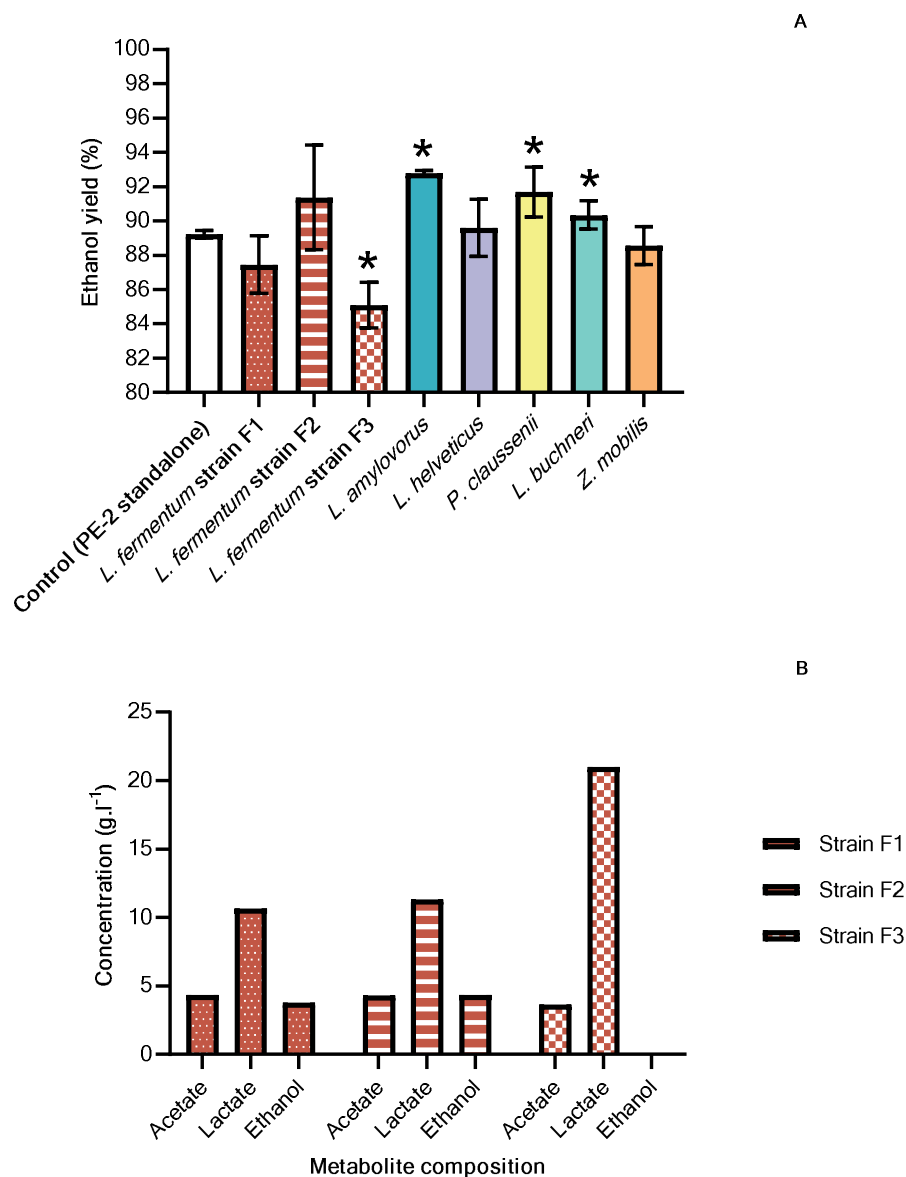

350  
 351 **Figure 5: Specific *L. fermentum* strains cause reduction in bioethanol fermentation yield. A:**  
 352 Ethanol yield of control fermentations (PE-2 yeast strain standalone) is compared against  
 353 pairwise fermentations with yeast strain PE-2 and 3 *L. fermentum* industrial isolates (filled bars);  
 354 and with each of the 5 most common contaminant bacteria found in sugarcane ethanol  
 355 fermentations. Of these species, which account for 80% of the contaminant microbial  
 356 community, only *L. fermentum* strains F1 and F3 reduce ethanol yield, albeit only F3 being

357 statistically significant (by  $1.98 \pm 1.68\%$  and  $4.63 \pm 1.35\%$  respectively; multiple t-test). \* $p < 0.05$ .

358 **B:** The metabolite profile of the different *L. fermentum* strain isolates supernatants. Strains F1  
359 and F2 show a similar metabolite production. On the other hand, strain F3 – the most detrimental  
360 one – presents a remarkably different metabolite production, with twice as much lactate (up to 21  
361  $\text{g x l}^{-1}$ ) and no ethanol produced, when compared to the other strains. This suggests that the mode  
362 of inhibition of lactobacilli is directly correlated with their organic acid production profile<sup>6</sup>.

363

364 In the detrimental strain F3 genome we identified a unique gene cluster that is involved in  
365 glycerol catabolism (KO2440, KO6120, KO6121 and KO6122). Glycerol is the second most  
366 abundant metabolite produced by *S. cerevisiae* in alcoholic fermentations<sup>33</sup>. The ability to use  
367 glycerol as an electron acceptor, as it is done by *L. reuteri*<sup>40</sup>, could likely provide a competitive  
368 advantage for these strains when growing in the presence of yeast, allowing them to exploit this  
369 exclusive niche created by yeast metabolism. Moreover, more of the carbon source could be  
370 deviated towards biomass production instead of energetic metabolism, since this strain would not  
371 require to reduce acetaldehyde into ethanol to rebalance the NADH/NAD<sup>+</sup> pool, as it is  
372 commonly done in lactobacilli. The metabolite profile data indeed suggests that such strain lacks  
373 ethanol production under fermentative conditions and provides a mechanism for its particular  
374 detrimental effects on overall ethanol yields. In order to identify functions or pathways in our *L.*  
375 *fermentum* strains that may have contributed to their distinct fermentation behaviour, we  
376 sequenced their genomes and conducted a comparative analysis (**Methods, Supplementary**  
377 **Table 7**). The genetic diversity found between these strain clusters could allow, in theory, for the  
378 development of modern diagnostic tools (e.g. qPCR analysis) which could predict the  
379 performance of future fermentation batches, improving the process control of this industry.

380

## 381 **Discussion**

382 Taken together, we have demonstrated that strain-level variation affects the output of a well-  
383 controlled industrial bioethanol fermentation process. This highlights the importance of using  
384 high-resolution, cross-sectional analysis of the contaminant microbiome in combination with  
385 relevant industrial indicators. We observe the interplay between *L. fermentum* and *L. amylovorus*  
386 that suggests competition between the two species in 2 ethanol producing mills. We also  
387 demonstrate the utility of the industrial sugarcane ethanol fermentation as a model system to  
388 study the dynamics and ecological interactions of microbial community, due to its highly  
389 compartmentalized setup, which enables the impact of perturbations (such as strain-level  
390 alterations) to be easily quantified.

391

392 Along these lines, we also introduce a novel metric by which to assess and compare the  
393 performance of an industrial bioethanol fermentation batch. Using this metric, we associated  
394 genetic variants of *L. fermentum* with fermentation efficiency, and identified the mechanism  
395 underlying the prevalence of detrimental strains as being the temperature of fermentations.  
396 Higher fermentation temperatures, above 32°C, privilege specific *L. fermentum* strains, which  
397 become the dominant strains in the population, and are considerably more detrimental to yeast  
398 fermentation, due to their different metabolic profile. Selective removal of the identified strain  
399 clusters could potentially improve ethanol yield by almost 5%, translating to estimated economic  
400 gains of 690 million USD<sup>41</sup> and more than 2 million tons per year of CO<sub>2</sub> emissions for the  
401 Brazilian bioethanol industry<sup>42</sup>.

402

403 **Acknowledgements**

404 The authors would like to acknowledge Marcos Vinícius, Thais Granço and Rafael Alves on  
405 their support on acquiring industrial samples and metadata. The authors would like to  
406 acknowledge Prof Dr Adriano Azzoni and Prof Dr René Schneider on providing access to  
407 laboratory equipment for processing industrial samples. The authors would like to acknowledge  
408 the support of Georges Neto on the processing of samples from the first sampling timepoint  
409 batch.

410 The research was supported by funding from The Novo Nordisk Foundation under NFF grant  
411 number: NNF10CC1016517. SSL acknowledges support from EMBO (ALTF 137-2018). TOB  
412 acknowledges funding from FAPESP, with grant numbers: 2015/50684-9 and 2018/17172-2.

413

414 **Author contributions**

415 FSOL, MAM, KK, SSL, TOB, GP and MOAS designed the study. FSOL, TOB and BLVC  
416 collected and processed industrial samples and metadata. FSOL prepared the metagenomics  
417 samples for sequencing. MAM, KK and SSL performed bioinformatics analyses. MAM, KK,  
418 SSL, FSOL, GP and MOAS critically analysed bioinformatics results. FSOL isolated industrial  
419 strains. FSOL designed and performed laboratory scale fermentations. FSOL and MOAS  
420 critically analysed the laboratory scale fermentation results. FSOL, MAM, KK, SSL and MOAS  
421 wrote the manuscript. All authors have provided inputs for the manuscript.

422

423 **Competing interests**

424 The authors declare they have no competing interests.

425

426 **Methods**

427 **Chemicals**

428 Unless stated otherwise, all chemicals and reagents used were purchased from Sigma-Aldrich  
429 (St. Louis, MO, USA).

430

431 **Sampling strategy**

432 We sampled two independent ethanol mills (named Mill A and Mill B) in the production season  
433 of 2017. Both mills are located in the State of São Paulo, Brazil - in a region with the prevalence  
434 of the humid subtropical climate (*Cfa*) with an annual precipitation of around 2000 mm, and with  
435 a sea-level altitude of *ca.* 600m. The mills were completely independent from each other, with a  
436 distance greater than 300 km apart, and have raw material sourced from different producers and  
437 sugarcane fields. Both mills operated via fed-batch fermentations (Melle-Boinot setup), and had  
438 a similar ethanol production capacity with a daily output of *ca.* 400m<sup>3</sup> of ethanol. Mill A was  
439 sampled in the dates: 26/05/2017; 26/10/2017 and 17/11/2017. Mill B was sampled in the dates:  
440 02/06/2017; 29/10/2017 and 03/11/2017. The following steps of the ethanol production process  
441 were sampled: (1) Fermentation broth (Feeding line with fresh fermentation media); (2) start; (3)  
442 middle; (4) end of fermentation; (5) yeast cream after separation of the wine, which is sent to  
443 distillation centrifugation); and (6) biomass after acid wash treatment (sulphuric acid pH 2.5 for  
444 1hour). The phases of the fermentation were defined according to the feeding regimen of each  
445 mill: the beginning was set as the beginning to the middle of the feeding; the middle was defined  
446 from the middle to the end of the feeding, and the end was defined as the final hours of  
447 fermentation, after the feeding had ceased. Due to the fact that different vessels are fed  
448 sequentially, we were able to sample different vats at different stages of fermentation, during the

449 same sampling. Samples were collected directly from the production process and diluted 1x in a  
450 sterile Phosphate Buffered Saline (PBS) solution with glycerol (50%). The samples were readily  
451 frozen in dry ice, until final storage in ultrafreezer (-80°C). Each mill had several vessels  
452 operating in the same fermentation step, which allowed for process replicates. Samples were  
453 taken in duplicates.

454

#### 455 **Industrial metadata**

456 The industrial metadata was provided by the operational staff from each mill, and consisted on  
457 key process control parameters collected and registered by industrial staff, related to the ethanol  
458 fermentation. Those parameters were: Ethanol yield daily average); ethanol yield (weekly  
459 average); acidity from wine ( $\text{g}_{\text{acetic acid equivalent}} \cdot \text{l}^{-1}$ , where  $\text{g}_{\text{acetic acid equivalent}}$  is related to  
460 the amount, in  $\text{g} \cdot \text{l}^{-1}$ , of acetic acid equivalent obtained via titration); yeast cell counts in the  
461 fermentation (CFU); bacteria cell counts in the fermentation (CFU); yeast viability (% of the  
462 population); yeast budding rate (% of the population); vessel current volume (in  $\text{m}^3$ ); vessel  
463 operational status (idle, feeding, running or finished fermentation) and vessel temperature (in  
464 °C).

465 For correlation analyses, the data was converted into monthly averages.

466

#### 467 **DNA extraction and sequencing of isolates and metagenomes**

468 All DNA extractions were performed using the DNeasy Powerlyzer Powersoil Kit (QIAGEN,  
469 Hilden, Germany), according to manufacturer's instructions. Pure lactobacilli isolates had their  
470 DNA extracted using MasterPure™ Gram Positive Purification Kit (LGC Biosearch  
471 Technologies, Hoddesdon, UK). All DNA extraction quantifications were performed with Qubit

472 Fluorometer (Thermo Fischer Scientific, Waltham, MS, USA). Due to low biomass content,  
473 DNA extraction was not possible for broth sample (Process Step 1) from Mill A at the 3<sup>rd</sup>  
474 sampling timepoint. Shotgun metagenomics and isolates genome sequencing was performed on  
475 the NextSeq 500 using NextSeq High Output v2 Kit (300 Cycles) (Illumina, San Diego, CA,  
476 USA) by the Sequencing Core Facility at The Novo Nordisk Foundation Center for  
477 Biosustainability (Technical University of Denmark, Kongens Lyngby, Denmark). The library  
478 preparation was performed using the KAPA HyperPlus Library Prep Kit (Roche, Basel,  
479 Switzerland), and the indexing kit used was the Dual Indexed PentAdapters, Illumina compatible  
480 (PentaBase, Odense, Denmark). Quantity and quality control were performed using Qubit  
481 dsDNA HS Assay Kit (Invitrogen, Carlsbad, CA, USA) and DNF-473 Standard Sensitivity NGS  
482 Fragment Analysis Kit (1 bp - 6000 bp; Agilent, Santa Clara, CA, USA). Average library length  
483 was 341 bp. The sequencing reads length were 150 base pair paired-end (2x150 bp). The index  
484 (i7 and i5) reads were 8 bp, dual indexed and flow cell loading was 1.3 pM. The sequencing  
485 chemistry used was 2-channel sequencing-by-synthesis (SBS) technology, and Phix control V3  
486 (Illumina San Diego, CA, USA) was added (2.5%).

487

#### 488 **Processing of genomic and metagenomic data**

489 Raw reads (from both metagenomic and isolate sequencing) underwent quality trimming, i.e.  
490 filter out adapter and universal primer sequences, as well as low quality bases (< Q20), reads  
491 shorter than 75 bp and duplicated reads (**Supplementary Table 2**), as previously described<sup>43</sup>.

492 All 481 *S. cerevisiae* genomes from NCBI genome database (August 2018) were downloaded.  
493 Reads were aligned to concatenated genomes using the BWA mem model with default  
494 parameters<sup>43</sup>. Reads over 95% identity were considered to belong to *S. cerevisiae* (SC reads) and



495 not used in our analyses (**Supplementary Table 2**). Kraken<sup>44</sup> was selected for taxonomic read  
496 assignment of non-SC reads as it has been shown to perform well in benchmarking studies<sup>45,46</sup>,  
497 especially for medium-low complexity microbiome communities<sup>47</sup> such as the ones in industrial  
498 fermenters. Specifically, Kraken v. 0.10.5-beta was applied on non-yeast reads with default  
499 settings against the minikraken 2017.10.18 8GB database. Bracken<sup>48</sup> v. 2.0 was used for accurate  
500 species abundance estimation with parameters -r (read length) 150 and -l (level) S (species).

501

### 502 **Analyses of metagenomics data**

503 Rarefaction of read counts and subsequent analyses were done using R package *vegan*<sup>49</sup>. We  
504 considered the 10 most prevalent contaminant species as those with the highest median relative  
505 abundance across all samples. Microbial community compositions were compared using Bray-  
506 Curtis distance on species relative abundance and Permutational Multivariate Analysis of  
507 Variance (PERMANOVA) with 999 permutations and the Bray-Curtis method was applied by  
508 providing Mill/Process step/Date as function. Pairwise Spearman's correlation coefficient was  
509 calculated for pairs of metadata variables, and between metadata variables and taxon  
510 abundances. False discovery rate (FDR) was calculated using Benjamini-Hochberg (BH)  
511 method, with FDR < 0.05 used as cut-off.

512

### 513 **Strain level profiling**

514 To profile the strains within a bacterial species, we used a published pipeline<sup>43,50</sup> with the  
515 following modifications: (1) all contigs from one NCBI genome were concatenated as a  
516 consecutive sequence with spacers (N of 100bp); (2) genome assemblies from the NCBI  
517 database were automatically downloaded and renamed; (3) the new NCBI accession ID system

518 in place of the old sequence ID and taxonomic ID system, which allowed more assemblies to be  
519 included. For each species, genomes were downloaded from the NCBI Genome database  
520 (August 2018) to construct a SNV and pan-genome database. In cases where more than 200  
521 genome assemblies existed, only complete assemblies and chromosome-level assemblies were  
522 used. The SNV-based core-genome strain profiling was used for downstream analyses. Strains  
523 with a maximum relative abundance less than 5% in at least one sample, or present in less than  
524 20% samples were discarded.

525 For each species, Spearman's correlation coefficient was calculated among different strains'  
526 relative abundance of all metagenomic samples. False discovery rate (FDR) was calculated using  
527 Benjamini-Hochberg (BH) method. FDR < 0.05 was used as the significant level cut-off. Strain  
528 abundance dissimilarity among different samples was calculated by Euclidean distances and  
529 hierarchical clustering was performed. As a result, all strains were clustered into two to six strain  
530 clusters for each species, where no significant negative correlation could be captured in each  
531 strain cluster (see **Supplementary Figure S3** as an example from *L. fermentum*).

532

### 533 **Industrial performance calculation**

534 The industrial performance calculation was obtained by the product of the multiplication of the  
535 parameters directed correlated with process performance (i.e. ethanol yield and yeast viability),  
536 divided by the product of the multiplication of the parameters inversely correlated with process  
537 performance (i.e. bacterial cell counts and acidity titre):

$$\text{Industrial performance} = \frac{(\text{Eth}_{\text{yield}} \times \text{Yeast}_{\text{viab}})}{(\text{Bac}_{\text{counts}} \times \text{Acid}_{\text{titre}})}$$

538 **Equation 1: Proposed equation for obtaining a general industrial performance score.** The  
539 score is obtained by multiplying ethanol yield ( $\text{Eth}_{\text{yield}}$ ) and yeast viability ( $\text{Yeast}_{\text{viab}}$ ) values, and

540 dividing its product by the product obtained from the multiplication of bacterial cell counts  
541 ( $Bac_{counts}$ ) and wine acidity titre ( $Acid_{titre}$ ) values.

542

### 543 **Strains used in laboratory experiments**

544 *Saccharomyces cerevisiae* strain PE-2 was kindly provided by Prof. Thiago Olitta Basso. Strains  
545 of *Lactobacillus amylovorus* and *Lactobacillus fermentum* were isolated from stored industrial  
546 samples. Strains of *Pediococcus claussenii*, *Lactobacillus helveticus*, *Lactobacillus buchneri* and  
547 *Zymomonas mobilis* were purchased from ATCC (Manassas, VA, USA).

548

### 549 **Isolation and maintenance of industrial strains**

550 For strain isolation, a previously introduced protocol was used<sup>13</sup>. Briefly, industrial samples were  
551 serially diluted in sterile PBS and plated in Man Rogosa Sharpe (MRS) Agar media, containing  
552 cycloheximide (0.1% v.v<sup>-1</sup>) in order to inhibit yeast growth. Plates were incubated at either 30°C  
553 or 37°C statically. A loopful of an isolated colony was grown in liquid MRS in the same  
554 conditions, and stored at -80°C (see section “DNA extraction and analysis of bacterial isolates”).  
555 Yeast strains were cultured in Yeast Potato Dextrose (YPD) media, at 30°C. Lactobacilli were  
556 cultured in MRS media, either at 30°C or 37°C, and *Zymomonas mobilis* was cultured at Trypsin  
557 Soy Broth (TSB) media, at 30°C. All cultivations were performed statically, in *ca.* 5ml volume.

558

### 559 **DNA extraction and analysis of bacterial isolates**

560 Pure isolates were grown overnight in adequate media and conditions, as mentioned in the  
561 previous section. After growth, cells were pelleted via centrifugation (> 10,000g for 4 min.) and

562 their genomic DNA was extracted using the MasterPure™ Gram Positive DNA Purification Kit  
563 (Lucigen Corporation, Middleton, WI), according to manual's instruction.

564

#### 565 **Bacterial isolate assembly**

566 A *de Bruijn* graph-based assembler, SPAdes 3.12<sup>51</sup>, was used for the genome assembly of  
567 bacterial isolates, using the following parameters: “-m 300 -k 33,55,77,99,127”. To complement  
568 the *de novo* assembly, reference-assisted genome assembly was performed with idba\_hybrid (v  
569 1.1.1)<sup>52</sup> with the following parameters “--pre\_correction --mink 120 --maxk 180 --step 10 --  
570 min\_contig 300 --reference [the reference genome downloaded from NCBI for each species]”.  
571 Two modifications were made in the source code before compiling IDBA\_UD: in file  
572 src/basic/kmer.h constant kNumUInt64 was changed from 4 to 8 to allow maximum kmer length  
573 beyond 124; in file src/sequence/short\_sequence.h constant kMaxShortSequence was set to 512  
574 to support longer read length. Final assembly results were summarized in **Supplementary Table**

#### 575 **4, Methods.**

576

#### 577 **Genome-based functional analysis**

578 ORFs were predicted on assembled strain genomes using MetaGeneMark v.3.26<sup>53</sup>. Predicted  
579 proteins were annotated using eggNOG mapper<sup>54</sup> with the following settings: mapping mode:  
580 DIAMOND, automatic taxonomic scope, orthologs: restrict to one-to-one (prioritize precision),  
581 GO evidence: use experimental-only terms (prioritize quality). From the resulting file, KEGG  
582 ortholog ids were extracted by significant matches (e-value < 10<sup>-5</sup>) and those that were unique  
583 for each strain cluster were characterized in terms of KEGG pathway/module membership  
584 (KEGG Mapper Pathway Reconstruct)<sup>55</sup>.

585

## 586 **Fermentation experiments**

587 Fermentations were performed in 96 deep-well plates, with either pairwise cultivations  
588 (yeast:bacteria at a 100:1 ratio)<sup>8</sup>, or standalone yeast or bacteria cultivations. The media used is a  
589 semi-synthetic media, able to simulate sugarcane molasses based media (SM)<sup>37</sup>. Briefly, all  
590 strains were cultured in their optimal media and conditions (see “Strains” and “Isolation of  
591 industrial strains and maintenance” sections), for up to 48h. After that, the biomass was  
592 calculated via optical density (OD; 600 nm wavelength). All cells were pelleted via  
593 centrifugation (3400 x g, 4°C, 15 min) and washed twice with sterile PBS. Subsequently, cells  
594 were diluted in SM diluted in sterile Milli-Q H<sub>2</sub>O (10x, final sugar concentration of 18g.l<sup>-1</sup>) for  
595 an OD value of 1.0. Strains were later diluted in fresh SM media in specific wells in the 96 deep-  
596 well plate to a final OD value of 0.1.

597 The lactobacilli growth rate analysis was performed at 30 and 37°C, under agitation (double  
598 orbital, fast mode) in Synergy H1 plate readers (Biotek Instruments, Inc. Winooski, VT, USA).  
599 OD was measured every 30 minutes for 24h. The growth rate was later calculated using the R  
600 package *growthcurver*<sup>56</sup>.

601

602 All the pairwise cultivations were performed statically, overnight, at 30°C, in ca. 1 ml volume.  
603 The fermentations were performed in triplicate. The carbohydrate titre and composition (sucrose,  
604 glucose and fructose) and fermentation metabolites (glycerol, ethanol, and acetic acid) were  
605 determined by high-performance liquid chromatography (HPLC) (UltiMate 3000, Thermo-  
606 Fischer Scientific, Waltham, Massachusetts, USA). The analites were separated using an Aminex  
607 HPX-87H ion exclusion column (Bio-Rad, Hercules, California, USA) and were isocratically

608 eluted at 30°C, with a flow rate of 0.6 ml.min<sup>-1</sup>, using a 5mM sulphuric acid solution as mobile  
609 phase. The detection was performed refractrometrically.

610 Ethanol yield was calculated according using the following equation:

$$\text{Ethanol yield} = \frac{(\text{EtOH}_{\text{obs}} \times 100)}{\text{EtOH}_{\text{theor}}}$$

611 **Equation 2: Ethanol yield calculation.** Where: EtOH<sub>obs</sub> = the observed ethanol titre on each  
612 sample. EtOH<sub>theor</sub> = the maximum theoretical ethanol titre for each sample. Obtained by  
613 multiplying the sugar titre from the broth solution with the stoichiometric conversion factor for  
614 ethanol production (i.e. 0.5111)<sup>57</sup>.

615

616 Community composition was resolved via flow-cytometry (BD LSRFortessa™, BD Biosciences,  
617 Franklin Lakes, New Jersey, USA). A sample from each well (10 µl) was taken after the  
618 overnight cultivation, and was transferred to a new microplate and diluted in 190µl PBS buffer  
619 (pH 7.4). Yeast and bacteria populations were resolved via front and side scatter comparison  
620 (SSC versus FSC). The statistical analyses were performed using the software GraphPad Prism  
621 8. The difference on final ethanol yield was analysed by multiple t-tests (statistical significance  
622 analysis with alpha value of 0.05).

623

624 Lactobacilli supernatant metabolite profile was analysed via HPLC after 48h of growth, using the  
625 aforementioned analytical method. A pre-inoculum of lactobacilli stored at -80°C was grown in  
626 MRS for 24h. After that the OD from these cultures was measured and fresh MRS media was  
627 inoculated with a fixed OD of 0.1 and incubate statically at 37°C. After growth, the cells were  
628 separated via centrifugation and the supernatant was sent for further analysis.

629

## 630 **Metagenomic co-assembly and functional annotation**

631 To overcome the imbalance between the sequencing yields of bacterial and fungal reads in  
632 different samples, achieve higher completeness of pan-genome regions with low sequencing  
633 coverage, and perform sample-wise gene presence and absence comparisons, co-assembly was  
634 performed for the non-SC reads. Non-SC reads were concatenated separately from all sequenced  
635 samples and the maximum *k*-mer depth was normalized to 100 fold by BBnorm  
636 (<https://sourceforge.net/projects/bbmap/>) before co-assembly. IDBA\_ud (v. 1.1.1)<sup>52</sup> was used for  
637 the assembly using the following parameters: “--min\_contig 300 --mink 50 --maxk 124 --step 10  
638 --pre\_correction”. Co-assembly results are summarized in **Supplementary Table 3, Methods**.  
639 For the non-SC assembly, MetaGeneMark v. 3.26 was adopted to predict the coding DNA  
640 sequence (CDS) regions in the assembled metagenome contigs using the default parameters.

641

## 642 **References**

- 643 1. Silvério da Silva, S. & Chandel, A. K. *Biofuels in Brazil*. (Springer, 2014).  
644 doi:10.1007/978-3-319-05020-1
- 645 2. Wang, M., Han, J., Dunn, J. B., Cai, H. & Elgowainy, A. Well-to-wheels energy use and  
646 greenhouse gas emissions of ethanol from corn, sugarcane and cellulosic biomass for US  
647 use. *Environ. Res. Lett.* **7**, 13 (2012).
- 648 3. Wheals, A. E., Basso, L. C., Alves, D. M. G. & Amorim, H. V. Fuel ethanol after 25  
649 years. *Trends Biotechnol.* **17**, 482–487 (1999).
- 650 4. Basso, L. C., Basso, T. O. & Rocha, S. N. Ethanol Production in Brazil: The Industrial  
651 Process and Its Impact on Yeast Fermentation. *Biofuel Prod. Recent Dev. Prospect.* **1530**,  
652 85–100 (2011).

- 653 5. Amorim, H. V. *et al.* Scientific challenges of bioethanol production in Brazil. *Appl.*  
654 *Microbiol. Biotechnol.* **91**, 1267–1275 (2011).
- 655 6. Basso, T. O. *et al.* Homo- and heterofermentative lactobacilli differently affect sugarcane-  
656 based fuel ethanol fermentation. *Antonie van Leeuwenhoek* **105**, 169–177 (2014).
- 657 7. Lopes, M. L. *et al.* Ethanol production in Brazil: a bridge between science and industry.  
658 *Brazilian J. Microbiol.* **47**, 64–76 (2016).
- 659 8. Ceccato-Antonini, S. R. Conventional and nonconventional strategies for controlling  
660 bacterial contamination in fuel ethanol fermentations. *World J. Microbiol. Biotechnol.* **34**,  
661 80 (2018).
- 662 9. Stubbendieck, R. M., Vargas-Bautista, C. & Straight, P. D. Bacterial Communities:  
663 Interactions to Scale. *Front. Microbiol.* **7**, 1234 (2016).
- 664 10. Sinsabaugh, R. L., Manzoni, S., Moorhead, D. L. & Richter, A. Carbon use efficiency of  
665 microbial communities: stoichiometry, methodology and modelling. *Ecol. Lett.* **16**, 930–  
666 939 (2013).
- 667 11. Ait Mueller, J. *et al.* Interspecies interactions are an integral determinant of microbial  
668 community dynamics. *Front. Microbiol.* **6**, 1–11 (2015).
- 669 12. Mankanjuola, D. B., Tymon, A. & Springham, D. G. Some effects of lactic acid bacteria on  
670 laboratory-scale yeast fermentations. *Enzyme Microb. Technol.* **14**, 350–357 (1992).
- 671 13. Lucena, B. T. L. *et al.* Diversity of lactic acid bacteria of the bioethanol process. *BMC*  
672 *Microbiol.* **10**, 298 (2010).
- 673 14. Bischoff, K. M., Liu, S., Leathers, T. D., Worthington, R. E. & Rich, J. O. Modeling  
674 bacterial contamination of fuel ethanol fermentation. *Biotechnol. Bioeng.* **103**, 117–122  
675 (2009).



- 676 15. Skinner, K. A. & Leathers, T. D. Bacterial contaminants of fuel ethanol production. *J. Ind.*  
677 *Microbiol. Biotechnol.* **31**, 401–408 (2004).
- 678 16. Beckner, M., Ivey, M. L. & Phister, T. G. Microbial contamination of fuel ethanol  
679 fermentations. *Lett. Appl. Microbiol.* **53**, 387–394 (2011).
- 680 17. Bonatelli, M. L., Quecine, M. C., Silva, M. S. & Labate, C. A. Characterization of the  
681 contaminant bacterial communities in sugarcane first-generation industrial ethanol  
682 production. *FEMS Microbiol. Lett.* **364**, 1–8 (2017).
- 683 18. Costa, O. Y. A. *et al.* Microbial diversity in sugarcane ethanol production in a Brazilian  
684 distillery using a culture-independent method. *J. Ind. Microbiol. Biotechnol.* **42**, 73–84  
685 (2015).
- 686 19. Narendranath, N. V., Hynes, S. H., Thomas, K. C. & Ingledew, W. M. Effects of  
687 lactobacilli on yeast-catalyzed ethanol fermentations. *Appl. Environ. Microbiol.* **63**, 4158–  
688 4163 (1997).
- 689 20. Rich, J. O., Leathers, T. D., Bischoff, Kenneth, M., Anderson, A. M. & Nunnally, M. S.  
690 Biofilm formation and ethanol inhibition by bacterial contaminants of biofuel  
691 fermentation. *Bioresour. Technol.* **196**, 347–354 (2015).
- 692 21. Yang, C. *et al.* Strain-level differences in gut microbiome composition determine fecal  
693 IgA levels and are modifiable by gut microbiota manipulation. *bioRxiv* 544015 (2019).  
694 doi:10.1101/544015
- 695 22. Koch, C., Müller, S., Harms, H. & Harnisch, F. Microbiomes in bioenergy production:  
696 From analysis to management. *Curr. Opin. Biotechnol.* **27**, 65–72 (2014).
- 697 23. Leathers, T. D. *et al.* Inhibitors of biofilm formation by biofuel fermentation  
698 contaminants. *Bioresour. Technol.* **169**, 45–51 (2014).

- 699 24. Li, Q., Heist, E. P. & Moe, L. A. Bacterial Community Structure and Dynamics During  
700 Corn-Based Bioethanol Fermentation. *Microb. Ecol.* **71**, 409–421 (2016).
- 701 25. Andrietta, S. R. R., Andrietta, M. G. S. & Bicudo, M. H. P. Comparação do rendimento  
702 fermentativo utilizando diferentes metodologias de cálculo para avaliação do desempenho  
703 de um processo industrial. *STAB* **30**, 41–49 (2012).
- 704 26. Bhalla, A., Bischoff, K. M. & Sani, R. K. Highly thermostable xylanase production from a  
705 thermophilic *Geobacillus* sp. strain WSUCF1 utilizing lignocellulosic biomass. *Front.*  
706 *Bioeng. Biotechnol.* **3**, 1–8 (2015).
- 707 27. Piper, P., Calderon, C. O., Hatzixanthis, K. & Mollapour, M. Weak acid adaptation □: the  
708 stress response that confers yeasts with resistance to organic acid food preservatives.  
709 *Microbiology* **147**, 2635–2642 (2001).
- 710 28. Liu, M. *et al.* Bacteriophage application restores ethanol fermentation characteristics  
711 disrupted by *Lactobacillus fermentum*. *Biotechnol. Biofuels* **8**, 132 (2015).
- 712 29. Bassi, A. P. G., Meneguello, L., Paraluppi, A. L., Sanches, B. C. P. & Ceccato-Antonini,  
713 S. R. Interaction of *Saccharomyces cerevisiae*–*Lactobacillus fermentum*–*Dekkera*  
714 *bruxellensis* and feedstock on fuel ethanol fermentation. *Antonie Van Leeuwenhoek* **111**,  
715 1661–1672 (2018).
- 716 30. Reis, V. R. *et al.* Effects of feedstock and co-culture of *Lactobacillus fermentum* and wild  
717 *Saccharomyces cerevisiae* strain during fuel ethanol fermentation by the industrial yeast  
718 strain PE-2. *AMB Express* **8**, 1–11 (2018).
- 719 31. Chang, I., Kim, B.-H., Shin, P.-K. & Lee, W.-K. Bacterial contamination and its effects on  
720 ethanol fermentation. *J. Microbiol. Biotechnol.* **5**, 309–314 (1995).
- 721 32. Carvalho-Netto, O. V *et al.* *Saccharomyces cerevisiae* transcriptional reprogramming due to

- 722 bacterial contamination during industrial scale bioethanol production. *Microb. Cell Fact.*  
723 **14**, 13 (2015).
- 724 33. Eli Della-Bianca, B., Olitta Basso, T., Ugarte Stambuk, B., Carlos Basso, L. & Karoly  
725 Gombert, A. What do we know about the yeast strains from the Brazilian fuel ethanol  
726 industry? *Appl. Microbiol. Biotechnol.* **97**, 979–991 (2013).
- 727 34. Kuratsu, M., Hamano, Y. & Dairi, T. Analysis of the *Lactobacillus* metabolic pathway.  
728 *Appl. Environ. Microbiol.* **76**, 7299–301 (2010).
- 729 35. Walford, S. Composition of cane juice. *Proc. South African Sugar Technol. Assoc.* **70**,  
730 265–266 (1996).
- 731 36. Basso, L. C., De Amorim, H. V., De Oliveira, A. J. & Lopes, M. L. Yeast selection for  
732 fuel ethanol production in Brazil. *FEMS Yeast Res.* **8**, 1155–1163 (2008).
- 733 37. Lino, F. S. de O., Basso, T. O. & Sommer, M. O. A. A synthetic medium to simulate  
734 sugarcane molasses. *Biotechnol. Biofuels* **11**, 221 (2018).
- 735 38. Liu, S., Skinner-Nemec, K. A. & Leathers, T. D. *Lactobacillus buchneri* strain NRRL B-  
736 30929 converts a concentrated mixture of xylose and glucose into ethanol and other  
737 products. *J. Ind. Microbiol. Biotechnol.* **35**, 75–81 (2008).
- 738 39. Nicolaou, S. A., Gaida, S. M. & Papoutsakis, E. T. A comparative view of metabolite and  
739 substrate stress and tolerance in microbial bioprocessing: From biofuels and chemicals, to  
740 biocatalysis and bioremediation. *Metab. Eng.* **12**, 307–331 (2010).
- 741 40. Stolz, P., Vogel, R. F. & Hammes, W. P. Utilization of electron acceptors by lactobacilli  
742 isolated from sourdough. *Z. Lebensm. Unters. Forsch.* **201**, 402–410 (1995).
- 743 41. Portal Unica. Available at: <http://www.unica.com.br/>. (Accessed: 6th February 2019)
- 744 42. Börjesson, P. Good or bad bioethanol from a greenhouse gas perspective – What

- 745 determines this? *Appl. Energy* **86**, 589–594 (2009).
- 746 43. Kang, K. *et al.* The Environmental Exposures and Inner- and Intercity Traffic Flows of the  
747 Metro System May Contribute to the Skin Microbiome and Resistome. *Cell Rep.* **24**,  
748 1190-1202.e5 (2018).
- 749 44. Wood, D. E. & Salzberg, S. L. Kraken: ultrafast metagenomic sequence classification  
750 using exact alignments. *Genome Biol.* **15**, R46 (2014).
- 751 45. Escobar-Zepeda, A. *et al.* Analysis of sequencing strategies and tools for taxonomic  
752 annotation: Defining standards for progressive metagenomics. *Sci. Rep.* **8**, 12034 (2018).
- 753 46. Gardner, P. P. *et al.* Identifying accurate metagenome and amplicon software via a meta-  
754 analysis of sequence to taxonomy benchmarking studies. *PeerJ* **7**, e6160 (2019).
- 755 47. Sczyrba, A. *et al.* Critical Assessment of Metagenome Interpretation—a benchmark of  
756 metagenomics software. *Nat. Methods* **14**, 1063–1071 (2017).
- 757 48. Lu, J., Breitwieser, F. P., Thielen, P. & Salzberg, S. L. Bracken: estimating species  
758 abundance in metagenomics data. *PeerJ Comput. Sci.* **3**, e104 (2017).
- 759 49. Dixon, P. VEGAN, a package of R functions for community ecology. *J. Veg. Sci.* **14**,  
760 927–930 (2003).
- 761 50. Oh, J. *et al.* Biogeography and individuality shape function in the human skin  
762 metagenome. *Nature* **514**, 59–64 (2014).
- 763 51. Bankevich, A. *et al.* SPAdes: a new genome assembly algorithm and its applications to  
764 single-cell sequencing. *J. Comput. Biol.* **19**, 455–77 (2012).
- 765 52. Peng, Y., Leung, H. C. M., Yiu, S. M. & Chin, F. Y. L. IDBA-UD: a de novo assembler  
766 for single-cell and metagenomic sequencing data with highly uneven depth.  
767 *Bioinformatics* **28**, 1420–1428 (2012).

- 768 53. Zhu, W., Lomsadze, A. & Borodovsky, M. Ab initio gene identification in metagenomic  
769 sequences. *Nucleic Acids Res.* **38**, e132 (2010).
- 770 54. Huerta-Cepas, J. *et al.* Fast Genome-Wide Functional Annotation through Orthology  
771 Assignment by eggNOG-Mapper. *Mol. Biol. Evol.* **34**, 2115–2122 (2017).
- 772 55. Kanehisa, M., Furumichi, M., Tanabe, M., Sato, Y. & Morishima, K. KEGG: New  
773 perspectives on genomes, pathways, diseases and drugs. *Nucleic Acids Res.* **45**, D353–  
774 D361 (2017).
- 775 56. Sprouffske, K. & Wagner, A. Growthcurver: An R package for obtaining interpretable  
776 metrics from microbial growth curves. *BMC Bioinformatics* **17**, 1–4 (2016).
- 777 57. Raghavendran, V., Basso, T. P., da Silva, J. B., Basso, L. C. & Gombert, A. K. A simple  
778 scaled down system to mimic the industrial production of first generation fuel ethanol in  
779 Brazil. *Antonie Van Leeuwenhoek* **110**, 971–983 (2017).
- 780
